# Supplementary material for: Locking the lattice oxygen in RuO2 to stabilize highly active Ru sites in acidic water oxidation
Source: PubMed Central journal article supplement (PMC10954744; doi:10.1038/s41467-024-46815-6), 2024-03-20
Supplement: 41467_2024_46815_MOESM1_ESM.pdf [file 41467_2024_46815_MOESM1_ESM.pdf]

# Locking the lattice oxygen in RuO<sub>2</sub> to stabilize highly active Ru sites in acidic water oxidation

Xinyu Ping<sup>1,3</sup>, Yongduo Liu<sup>1,3</sup>, Lixia Zheng<sup>1</sup>, Yang Song<sup>1</sup>, Lin Guo<sup>2</sup>, Siguo Chen<sup>1\*</sup>, Zidong Wei<sup>1</sup>

<sup>1</sup> College of Chemistry and Chemical Engineering, Chongqing University, Chongqing, China

<sup>2</sup> State Key Laboratory of Catalytic Materials and Reaction Engineering, SINOPEC Research Institute of Petroleum Processing Co., Ltd., Beijing, China

<sup>3</sup> These authors contributed equally to this work.

\* Correspondence to: csg810519@126.com

## Supplementary Information for

# Locking the lattice oxygen in RuO<sub>2</sub> to stabilize highly active Ru sites in acidic water oxidation

### Contents:

|                                                                                                                                                                                                                                                                                                                                                                                                                                                                                                 |    |
|-------------------------------------------------------------------------------------------------------------------------------------------------------------------------------------------------------------------------------------------------------------------------------------------------------------------------------------------------------------------------------------------------------------------------------------------------------------------------------------------------|----|
| <b>Supplementary Figure 1.</b> (a) TEM image of Si-RuO <sub>2</sub> -0; (b) particle size distribution of Si-RuO <sub>2</sub> -0; (c) HRTEM image of Si-RuO <sub>2</sub> -0; (d) HAADF-STEM and corresponding elemental mapping images of Ru and O.....                                                                                                                                                                                                                                         | 4  |
| <b>Supplementary Figure 2.</b> (a) TEM image of Si-RuO <sub>2</sub> -0.05; (b) particle size distribution of Si-RuO <sub>2</sub> -0.05; (c) HRTEM image of Si-RuO <sub>2</sub> -0.05; (d) HAADF-STEM and corresponding elemental mapping images of Si, Ru and O. ....                                                                                                                                                                                                                           | 5  |
| <b>Supplementary Figure 3.</b> (a) TEM image of Si-RuO <sub>2</sub> -0.1; (b) particle size distribution of Si-RuO <sub>2</sub> -0.1; (c) HRTEM image of Si-RuO <sub>2</sub> -0.1; (d) HAADF-STEM and corresponding elemental mapping images of Si, Ru and O. ....                                                                                                                                                                                                                              | 6  |
| <b>Supplementary Figure 4.</b> (a) TEM image of Si-RuO <sub>2</sub> -0.2; (b) particle size distribution of Si-RuO <sub>2</sub> -0.2; (c) HRTEM image of Si-RuO <sub>2</sub> -0.2; (d) HAADF-STEM and corresponding elemental mapping images of Si, Ru and O. ....                                                                                                                                                                                                                              | 7  |
| <b>Supplementary Figure 5.</b> (a) TEM image of Si-RuO <sub>2</sub> -0.3; (b) particle size distribution of Si-RuO <sub>2</sub> -0.3; (c) HRTEM image of Si-RuO <sub>2</sub> -0.3; (d) HAADF-STEM and corresponding elemental mapping images of Si, Ru and O. ....                                                                                                                                                                                                                              | 8  |
| <b>Supplementary Figure 6.</b> The first derivative curves of the Ru <i>K</i> -edge XANES spectra of Si-RuO <sub>2</sub> -0.1 and Com-RuO <sub>2</sub> .....                                                                                                                                                                                                                                                                                                                                    | 9  |
| <b>Supplementary Figure 7.</b> EXAFS fitting in R-space of (a) Si-RuO <sub>2</sub> -0.1 and (b) Com-RuO <sub>2</sub> . R-mag represents the magnitude of the EXAFS data in R-space; R-Imag is the imaginary part of the EXAFS data in R-space.....                                                                                                                                                                                                                                              | 10 |
| <b>Supplementary Figure 8.</b> The modeled structures of (a) Ru <sub>16</sub> O <sub>32</sub> and (b-h) different Ru <sub>16</sub> Si <sub>2</sub> O <sub>32</sub> after optimization (denoted A-M-X, where A represents the first Si atom occupies the A-site; M represents the position occupied by the second Si atom, M = A, B, C or D; X represents the spatial position located by second Si atom, X = t or b, t is top, b is bottom). Color code: Si (blue), Ru (gray) and O (red). .... | 11 |
| <b>Supplementary Figure 9.</b> Gibbs free energy of different structural models. The A-C-b model as most stable structure was selected for subsequent analysis. ....                                                                                                                                                                                                                                                                                                                            | 12 |
| <b>Supplementary Figure 10.</b> PDOS plots of the Ru <i>4d</i> and O <i>2p</i> orbitals of (a) Si-RuO <sub>2</sub> slab and RuO <sub>2</sub> slab and (b) Si-RuO <sub>2</sub> bulk and RuO <sub>2</sub> bulk.....                                                                                                                                                                                                                                                                               | 13 |
| <b>Supplementary Figure 11.</b> Theoretical calculations of the acidic OER activity of the established models of on (a) Si-RuO <sub>2</sub> and (b) RuO <sub>2</sub> .....                                                                                                                                                                                                                                                                                                                      | 14 |

|                                                                                                                                                                                         |    |
|-----------------------------------------------------------------------------------------------------------------------------------------------------------------------------------------|----|
| <b>Supplementary Figure 12.</b> S-number of Si-RuO <sub>2</sub> -0.1, Si-RuO <sub>2</sub> -0 and Com-RuO <sub>2</sub> at 10 mA cm <sup>-2</sup> .<br>.....                              | 15 |
| <b>Supplementary Figure 13.</b> TEM image of Si-RuO <sub>2</sub> -0.1 after the 800 h test.....                                                                                         | 16 |
| <b>Supplementary Figure 14.</b> Ru 3 <i>p</i> spectra for (a) Si-RuO <sub>2</sub> -0.1, (b) Si-RuO <sub>2</sub> -0 and (c) Com-RuO <sub>2</sub> before and after stability testing..... | 17 |
| <b>Supplementary Figure 15.</b> O 1 <i>s</i> spectra for (a) Si-RuO <sub>2</sub> -0.1, (b) Si-RuO <sub>2</sub> -0 and (c) Com-RuO <sub>2</sub> before and after stability testing.....  | 18 |
| <b>Supplementary Figure 16.</b> DEMS measurements of (a) Si-RuO <sub>2</sub> -0.1 and (b) Com-RuO <sub>2</sub> .....                                                                    | 19 |
| <b>Supplementary Table 1.</b> Structural parameters of Si-RuO <sub>2</sub> -0.1 and the reference samples extracted from the EXAFS fitting.....                                         | 20 |
| <b>Supplementary Table 2.</b> Lattice parameters and unit-cell volume of the modeled structures after optimization. ....                                                                | 21 |
| <b>Supplementary Table 3.</b> The detailed information for the free energy change of reaction intermediates (*OH, *O, *OOH) on the unsaturated Ru site.....                             | 22 |
| <b>Supplementary Table 4.</b> Comparison of the OER performance of reported representative Ru-based oxide electrocatalysts in acidic media.....                                         | 23 |
| <b>Supplementary Note 1</b> .....                                                                                                                                                       | 24 |
| <b>Supplementary References</b> .....                                                                                                                                                   | 25 |

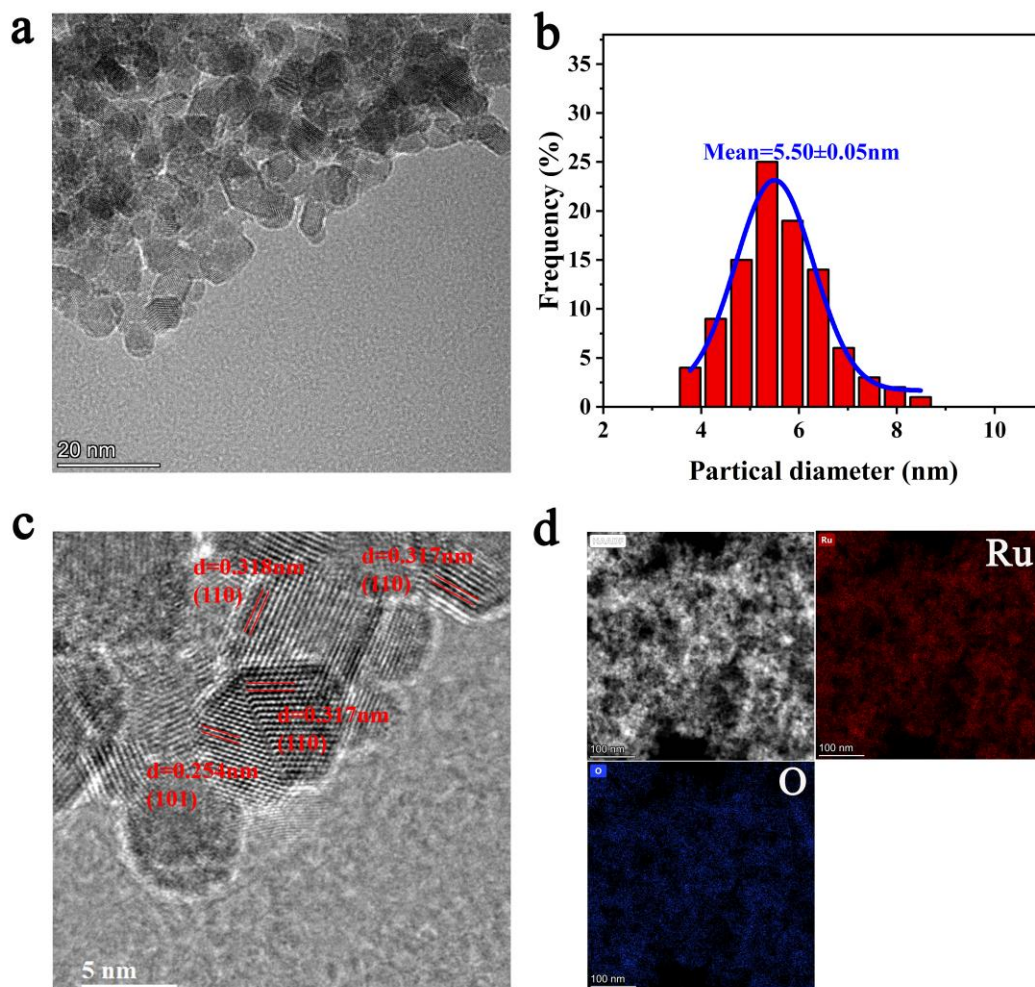

**Supplementary Figure 1.** (a) TEM image of Si-RuO<sub>2</sub>-0; (b) particle size distribution of Si-RuO<sub>2</sub>-0; (c) HRTEM image of Si-RuO<sub>2</sub>-0; (d) HAADF-STEM and corresponding elemental mapping images of Ru and O.

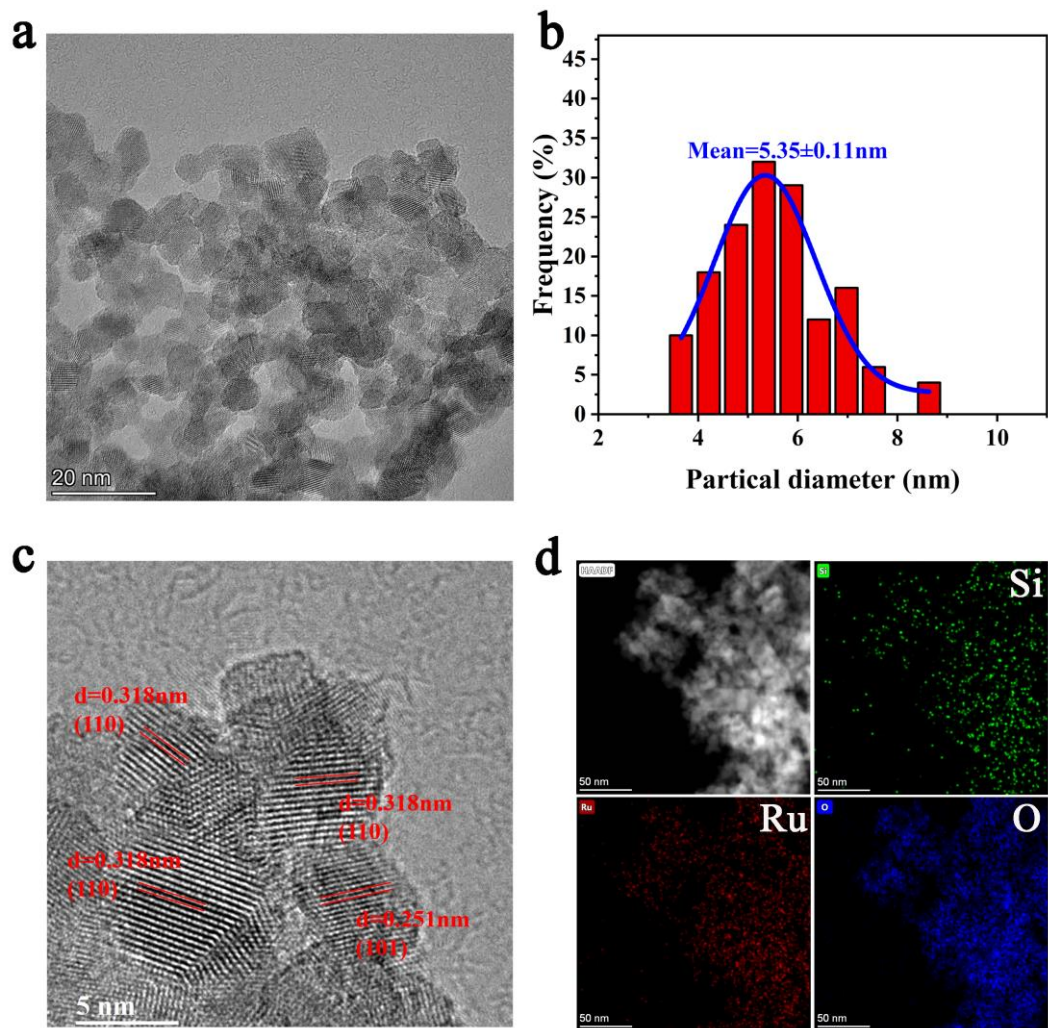

**Supplementary Figure 2.** (a) TEM image of Si-RuO<sub>2</sub>-0.05; (b) particle size distribution of Si-RuO<sub>2</sub>-0.05; (c) HRTEM image of Si-RuO<sub>2</sub>-0.05; (d) HAADF-STEM and corresponding elemental mapping images of Si, Ru and O.

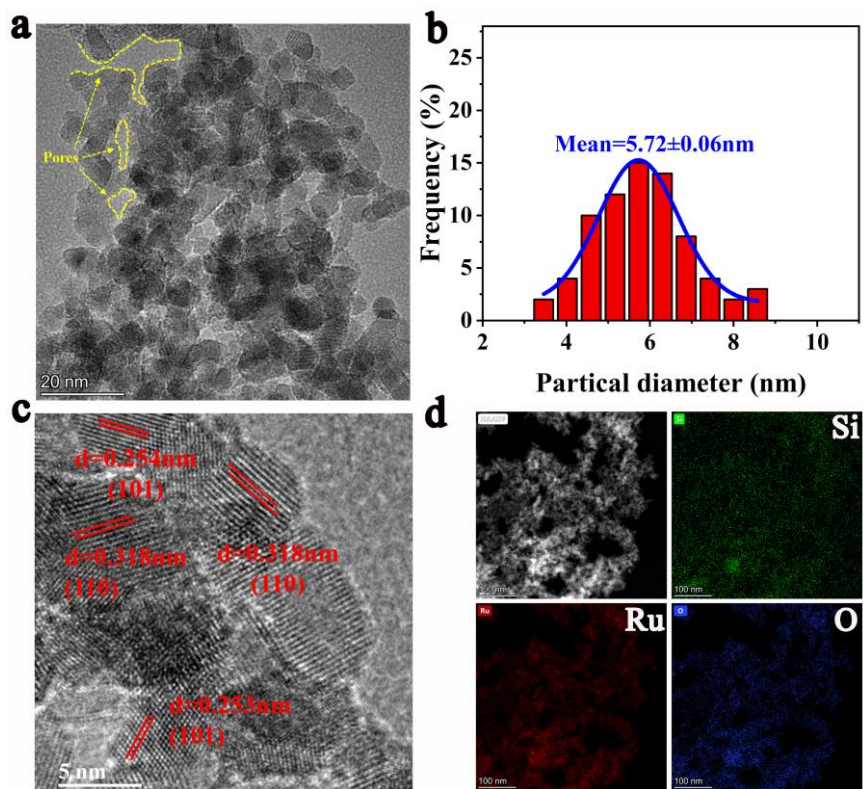

**Supplementary Figure 3.** (a) TEM image of Si-RuO<sub>2</sub>-0.1; (b) particle size distribution of Si-RuO<sub>2</sub>-0.1; (c) HRTEM image of Si-RuO<sub>2</sub>-0.1; (d) HAADF-STEM and corresponding elemental mapping images of Si, Ru and O.

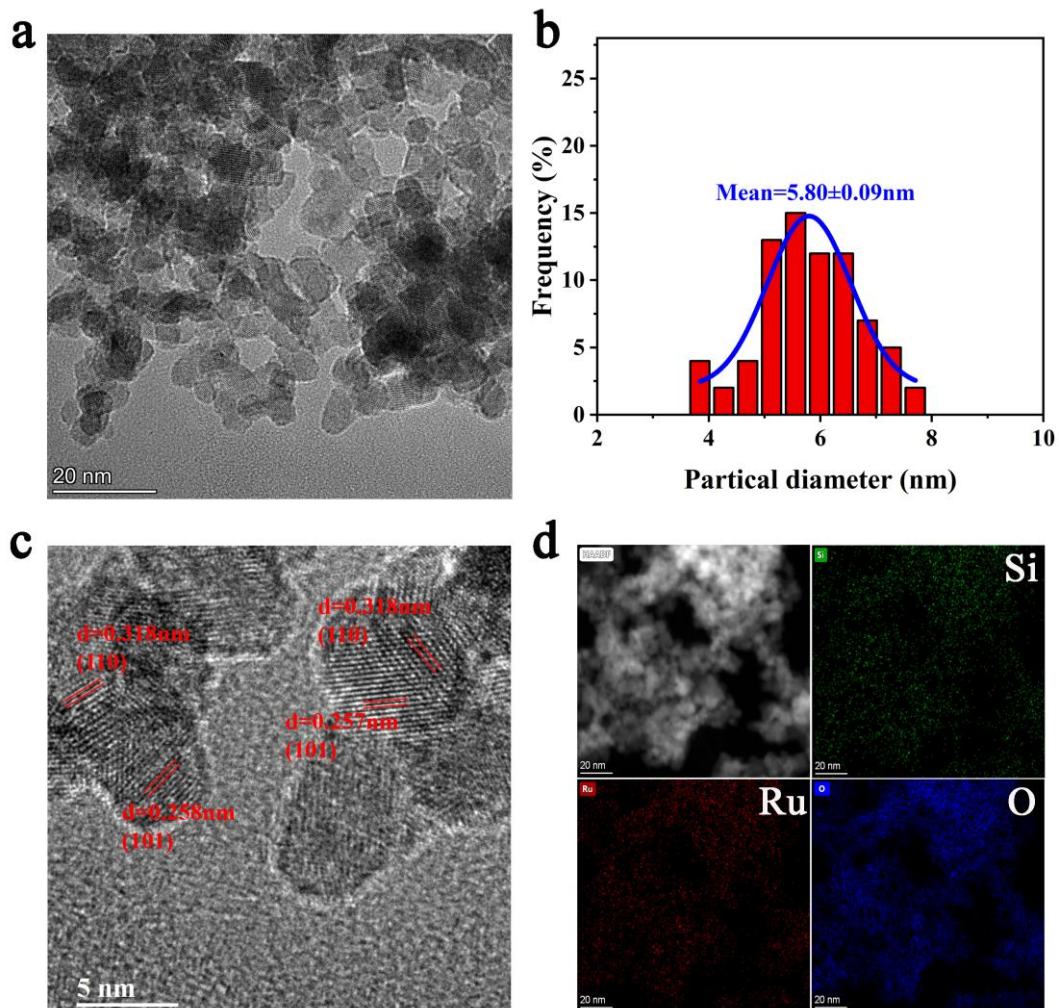

**Supplementary Figure 4.** (a) TEM image of Si-RuO<sub>2</sub>-0.2; (b) particle size distribution of Si-RuO<sub>2</sub>-0.2; (c) HRTEM image of Si-RuO<sub>2</sub>-0.2; (d) HAADF-STEM and corresponding elemental mapping images of Si, Ru and O.

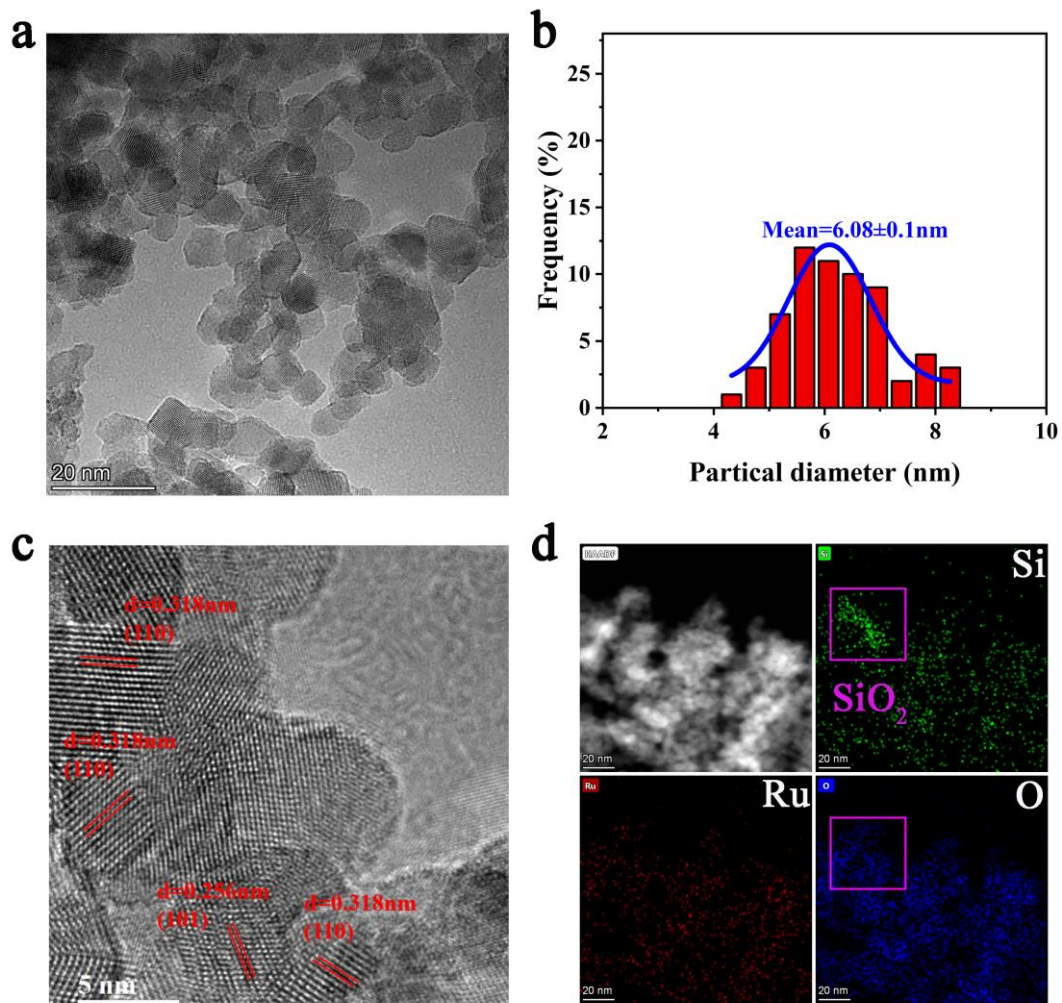

**Supplementary Figure 5.** (a) TEM image of Si-RuO<sub>2</sub>-0.3; (b) particle size distribution of Si-RuO<sub>2</sub>-0.3; (c) HRTEM image of Si-RuO<sub>2</sub>-0.3; (d) HAADF-STEM and corresponding elemental mapping images of Si, Ru and O.



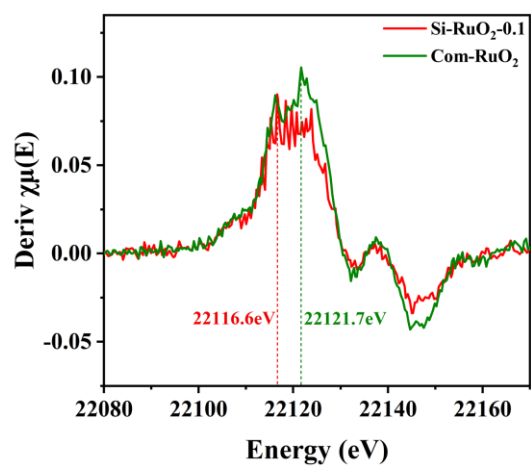

**Supplementary Figure 6.** The first derivative curves of the Ru *K*-edge XANES spectra of Si-RuO<sub>2</sub>-0.1 and Com-RuO<sub>2</sub>.

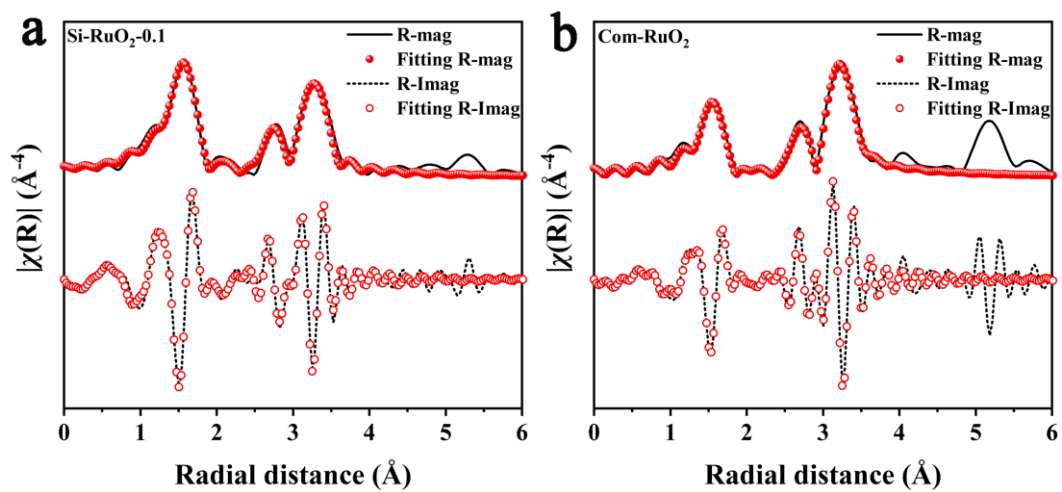

**Supplementary Figure 7.** EXAFS fitting in R-space of (a)  $\text{Si-RuO}_2\text{-0.1}$  and (b)  $\text{Com-RuO}_2$ . R-mag represents the magnitude of the EXAFS data in R-space; R-Imag is the imaginary part of the EXAFS data in R-space.

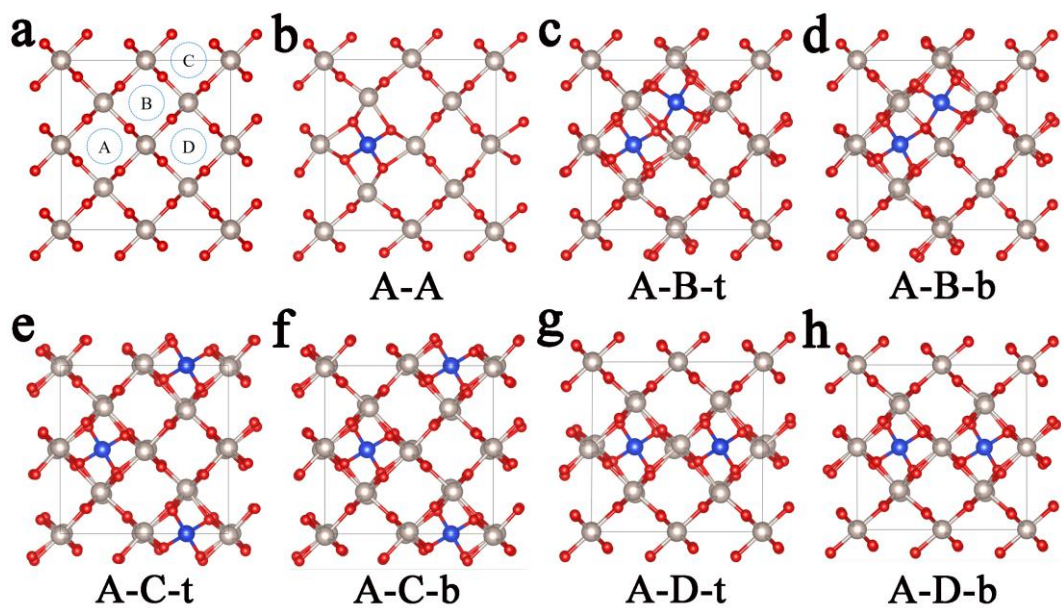

**Supplementary Figure 8.** The modeled structures of (a) Ru<sub>16</sub>O<sub>32</sub> and (b-h) different Ru<sub>16</sub>Si<sub>2</sub>O<sub>32</sub> after optimization (denoted A-M-X, where A represents the first Si atom occupies the A-site; M represents the position occupied by the second Si atom, M = A, B, C or D; X represents the spatial position located by second Si atom, X = t or b, t is top, b is bottom). Color code: Si (blue), Ru (gray) and O (red).

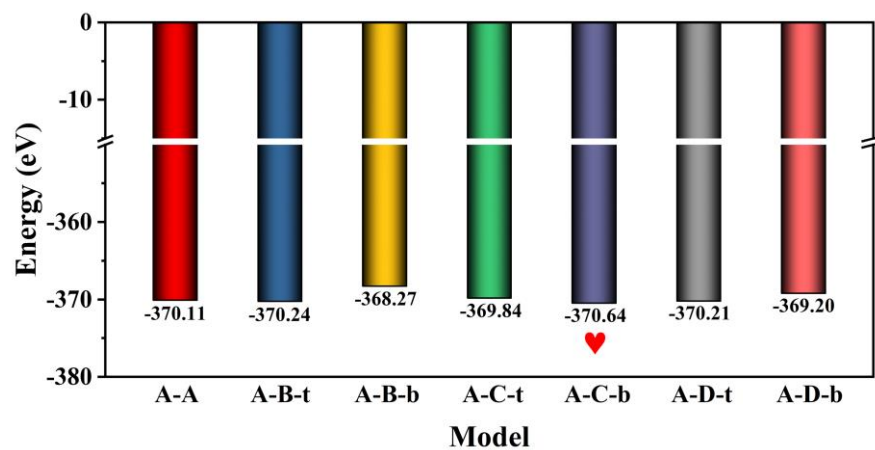

**Supplementary Figure 9.** Gibbs free energy of different structural models. The A-C-b model as most stable structure was selected for subsequent analysis.

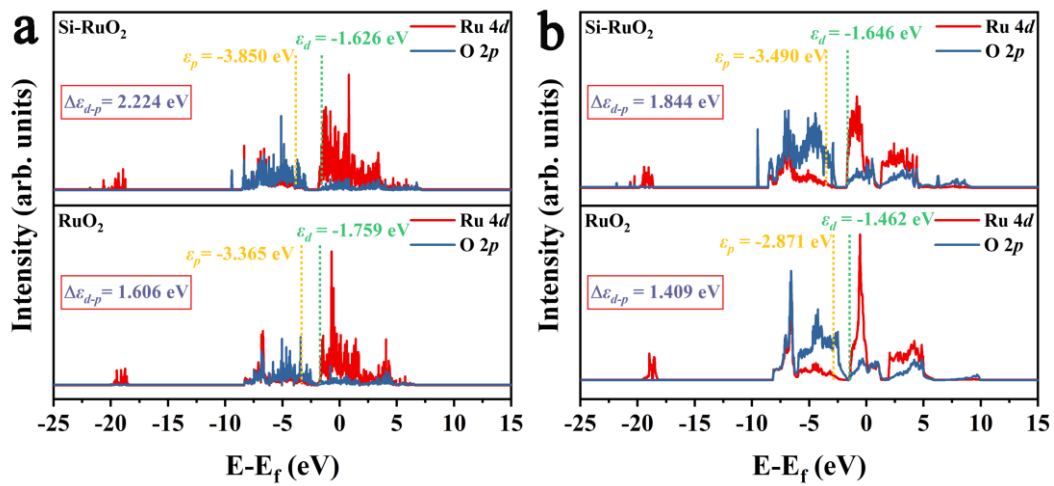

**Supplementary Figure 10.** PDOS plots of the Ru 4d and O 2p orbitals of (a) Si-RuO<sub>2</sub> slab and RuO<sub>2</sub> slab and (b) Si-RuO<sub>2</sub> bulk and RuO<sub>2</sub> bulk.

Although the band center of Ru 4d on the bulk and the (110) plane present different trends, the gap between Ru 4d band center and O 2p band center is still enlarged due to the downshift of the O 2p band center. All results indicate that the covalency of Ru-O bond in Si-RuO<sub>2</sub> is lower than that of RuO<sub>2</sub>.

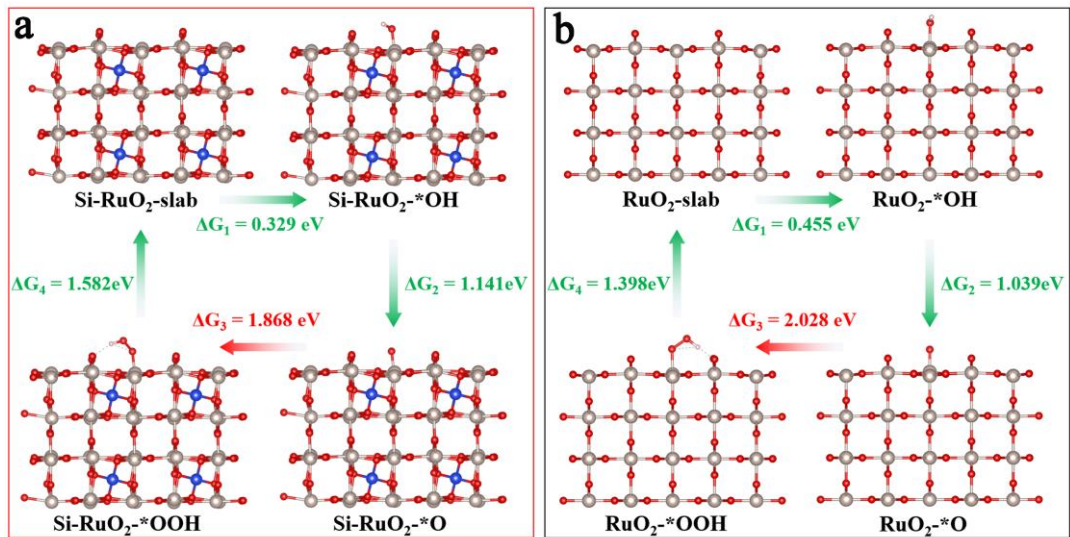

**Supplementary Figure 11.** Theoretical calculations of the acidic OER activity of the established models of on (a) Si-RuO<sub>2</sub> and (b) RuO<sub>2</sub>.

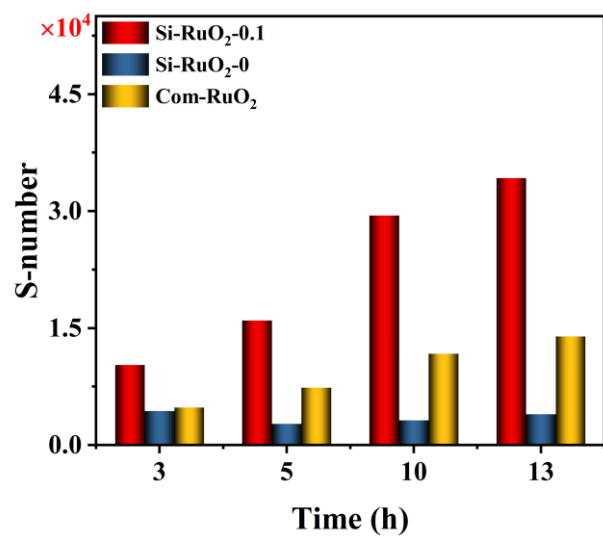

**Supplementary Figure 12.** S-number of Si-RuO<sub>2</sub>-0.1, Si-RuO<sub>2</sub>-0 and Com-RuO<sub>2</sub> at 10 mA cm<sup>-2</sup>.

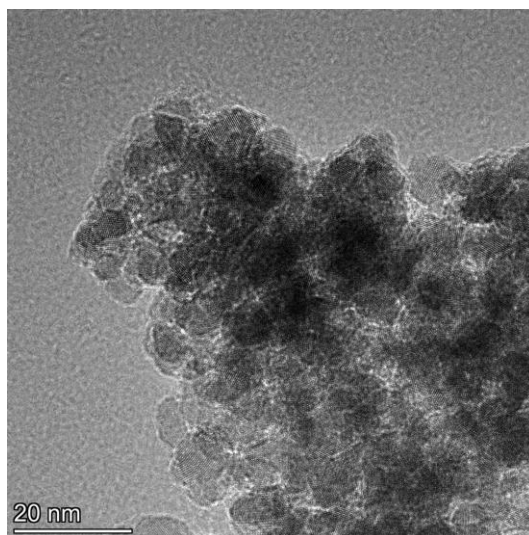

**Supplementary Figure 13.** TEM image of Si-RuO<sub>2</sub>-0.1 after the 800 h test.



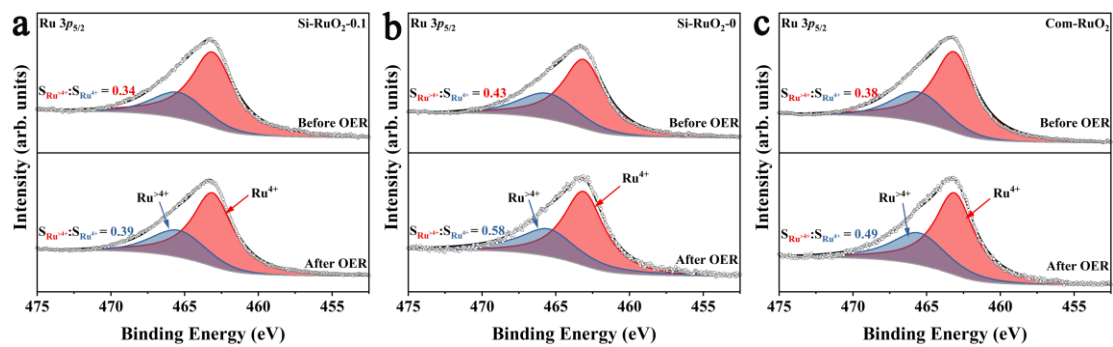

**Supplementary Figure 14.** Ru 3p spectra for (a) Si-RuO<sub>2</sub>-0.1, (b) Si-RuO<sub>2</sub>-0 and (c) Com-RuO<sub>2</sub> before and after stability testing.

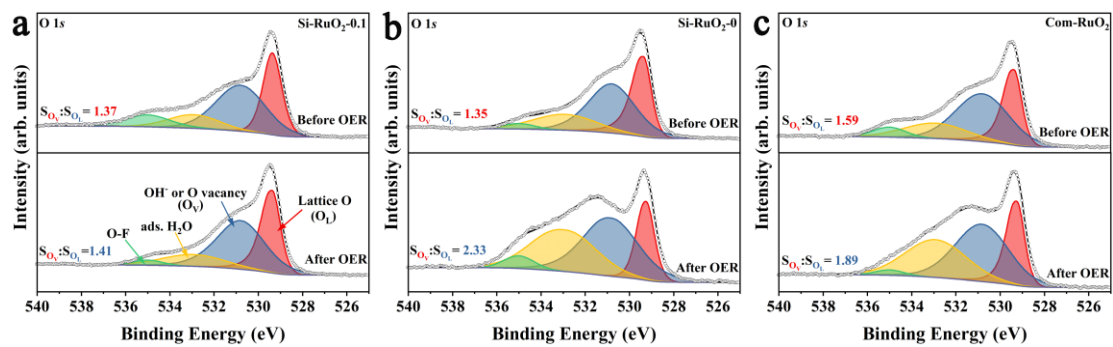

**Supplementary Figure 15.** O 1s spectra for (a) Si-RuO<sub>2</sub>-0.1, (b) Si-RuO<sub>2</sub>-0 and (c) Com-RuO<sub>2</sub> before and after stability testing.

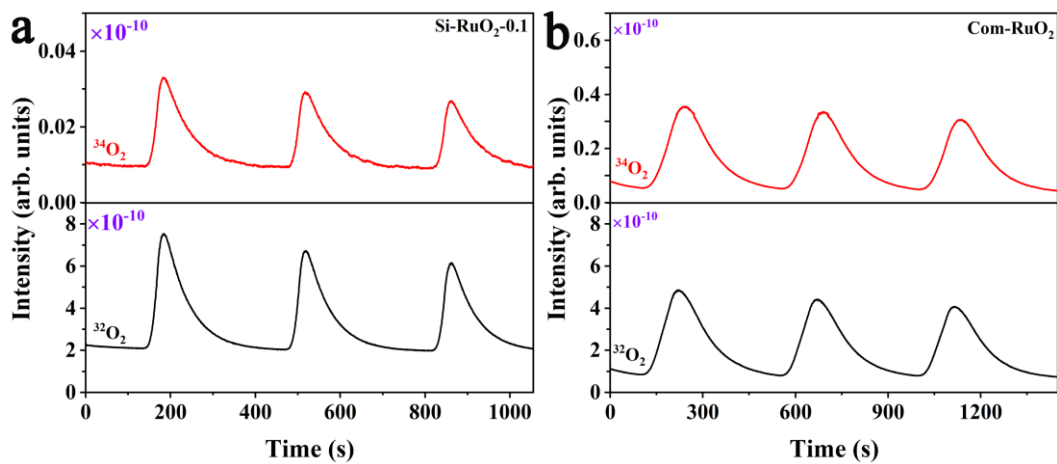

Supplementary Figure 16. DEMS measurements of (a) Si-RuO<sub>2</sub>-0.1 and (b) Com-RuO<sub>2</sub>.

**Supplementary Table 1.** Structural parameters of Si-RuO<sub>2</sub>-0.1 and the reference samples extracted from the EXAFS fitting.

|                          | Shell              | CN        | R(Å)       | $\sigma^2$ | $\Delta E_0$ (eV) | R factor |
|--------------------------|--------------------|-----------|------------|------------|-------------------|----------|
| Ru foil                  | Ru-Ru <sub>1</sub> | 6         | 2.62±0.008 | 0.00085    | 4.68±0.98         | 0.0029   |
|                          | Ru-Ru <sub>2</sub> | 6         | 2.71±0.012 | 0.00005    | -3.56±1.91        |          |
| Com-RuO <sub>2</sub>     | Ru-O               | 6         | 1.96±0.004 | 0.0027     | -3.79±1.15        | 0.0143   |
|                          | Ru-Ru <sub>1</sub> | 2         | 3.11±0.005 | 0.0025     | -3.79±1.15        |          |
|                          | Ru-Ru <sub>2</sub> | 8         | 3.55±0.004 | 0.0030     | -3.79±1.15        |          |
| Si-RuO <sub>2</sub> -0.1 | Ru-O               | 6.13±0.90 | 1.98±0.01  | 0.0047     | 4.68±3.45         | 0.0187   |
|                          | Ru-Ru <sub>1</sub> | 1.26±0.32 | 3.13±0.03  | 0.0034     | 0.32±7.74         |          |
|                          | Ru-Ru <sub>2</sub> | 5.03±0.32 | 3.57±0.01  | 0.0045     | 3.10±2.81         |          |

*CN*: coordination number; *R*: bond distance;  $\sigma^2$ : Debye-Waller factor;  $\Delta E_0$ : inner potential correction. *R* factor: goodness of fit.  $S_0^2$  was set to 0.92, according to the experimental EXAFS fit of the Ru foil reference by fixing *CN* as the known crystallographic value.

**Supplementary Table 2.** Lattice parameters and unit-cell volume of the modeled structures after optimization.

| Modeled structures               | Lattice parameters |         |         |          |         |          | Unit-cell volume ( $\text{\AA}^3$ ) |
|----------------------------------|--------------------|---------|---------|----------|---------|----------|-------------------------------------|
|                                  | a                  | b       | c       | $\alpha$ | $\beta$ | $\gamma$ |                                     |
| Ru <sub>16</sub> O <sub>32</sub> | 9.03983            | 9.03983 | 6.23868 | 90       | 90      | 90.0021  | 509.8158                            |
| A-A                              | 9.31716            | 9.31966 | 6.25462 | 90.0054  | 89.9996 | 89.9945  | 543.1056                            |
| A-B-t                            | 9.28840            | 9.28903 | 6.28375 | 89.9643  | 90.0362 | 90.0157  | 542.1636                            |
| A-B-b                            | 9.22747            | 9.24128 | 6.32503 | 89.9737  | 90.1670 | 90.0108  | 539.3540                            |
| A-C-t                            | 9.27393            | 9.27411 | 6.30608 | 90.0035  | 90.0035 | 90.0022  | 542.3695                            |
| A-C-b                            | 9.28328            | 9.28311 | 6.29862 | 89.9967  | 90.0003 | 89.9999  | 542.8007                            |
| A-D-t                            | 9.30198            | 9.25337 | 6.29996 | 89.9988  | 90.0006 | 89.5885  | 542.2534                            |
| A-D-b                            | 9.38953            | 9.12285 | 6.31181 | 89.9984  | 90.0018 | 90.0746  | 540.6645                            |

**Supplementary Table 3.** The detailed information for the free energy change of reaction intermediates (\*OH, \*O, \*OOH) on the unsaturated Ru site.

| Structure                 | Model | E/eV      | G(T)/eV | G         | Process                               | G-final   | G (U=0 V) | $\Delta G$ |
|---------------------------|-------|-----------|---------|-----------|---------------------------------------|-----------|-----------|------------|
| <b>RuO<sub>2</sub></b>    | Slab  | -1343.076 | 0       | -1343.076 | 2H <sub>2</sub> O                     | -1371.510 | 0         |            |
|                           | *OH   | -1353.752 | 0.320   | -1353.432 | H <sub>2</sub> O + 1/2 H <sub>2</sub> | -1371.055 | 0.455     | 0.455      |
|                           | *O    | -1349.038 | 0.050   | -1348.988 | H <sub>2</sub> O + H <sub>2</sub>     | -1370.016 | 1.494     | 1.039      |
|                           | *OOH  | -1358.144 | 0.373   | -1357.771 | 3/2 H <sub>2</sub>                    | -1367.988 | 3.522     | 2.028      |
|                           | Slab  | -1343.076 | 0       | -1343.076 | 2 H <sub>2</sub> + O <sub>2</sub>     | -1366.590 | 4.920     | 1.398      |
| <b>Si-RuO<sub>2</sub></b> | Slab  | -1394.780 | 0       | -1394.780 | 2H <sub>2</sub> O                     | -1423.215 | 0         |            |
|                           | *OH   | -1405.598 | 0.335   | -1405.263 | H <sub>2</sub> O + 1/2 H <sub>2</sub> | -1422.886 | 0.329     | 0.329      |
|                           | *O    | -1400.770 | 0.054   | -1400.716 | H <sub>2</sub> O + H <sub>2</sub>     | -1421.744 | 1.470     | 1.141      |
|                           | *OOH  | -1410.033 | 0.374   | -1409.659 | 3/2 H <sub>2</sub>                    | -1419.876 | 3.338     | 1868       |
|                           | Slab  | -1394.780 | 0       | -1394.780 | 2 H <sub>2</sub> + O <sub>2</sub>     | -1418.295 | 4.920     | 1.582      |

**Supplementary Table 4.** Comparison of the OER performance of reported representative Ru-based oxide electrocatalysts in acidic media.

| Catalyst                                                              | Overpotential<br>(mV@10 mA cm <sup>-2</sup> ) | Tafel<br>slope | Stability (h)<br>@10 mA m <sup>-2</sup> | Degradation<br>rate (μV h <sup>-1</sup> ) * | Reference        |
|-----------------------------------------------------------------------|-----------------------------------------------|----------------|-----------------------------------------|---------------------------------------------|------------------|
| <b>Si-RuO<sub>2</sub>-0.1</b>                                         | <b>226</b>                                    | <b>33</b>      | <b>800</b>                              | <b>52</b>                                   | <b>This work</b> |
| W <sub>0.2</sub> Er <sub>0.1</sub> Ru <sub>0.7</sub> O <sub>2-δ</sub> | 168                                           | 66.8           | 500                                     | 176                                         | 1                |
| S-RuCuO NRs/C                                                         | 231                                           | 39.7           | 250                                     | 176                                         | 2                |
| PRPO-350                                                              | 174                                           | 28.8           | 150                                     | 385                                         | 3                |
| Ru <sub>3</sub> MoCeO <sub>x</sub>                                    | 164                                           | 61.2           | 100                                     | 194                                         | 4                |
| Li <sub>0.52</sub> RuO <sub>2</sub>                                   | 156                                           | 83.5           | 70                                      | 1685                                        | 5                |
| a/c RuO <sub>2</sub>                                                  | 205                                           | 48.6           | 60                                      | 1450                                        | 6                |
| Co <sub>0.11</sub> Ru <sub>0.89</sub> O <sub>2</sub>                  | 169                                           | 49             | 50                                      | 1580                                        | 7                |
| C-RuO <sub>2</sub> -RuSe-10                                           | 242                                           | 50.4           | 50                                      | 3840                                        | 8                |
| Mg-RuO <sub>2</sub>                                                   | 228                                           | 48.66          | 30                                      | 4666                                        | 9                |
| CaCu <sub>3</sub> Ru <sub>4</sub> O <sub>12</sub>                     | 171                                           | 40             | 24                                      | 875                                         | 10               |
| 75-H-RuO <sub>2</sub>                                                 | 200                                           | 71             | 20                                      | 3950                                        | 11               |
| Ufd-RuO <sub>2</sub> /CC                                              | 179                                           | 36.9           | 20                                      | 950                                         | 12               |
| Mn <sub>0.73</sub> Ru <sub>0.27</sub> O <sub>2</sub>                  | 208                                           | 65.3           | 10                                      | 5200                                        | 13               |
| Mn-RuO <sub>2</sub>                                                   | 158                                           | 42.94          | 10                                      | 19200                                       | 14               |
| Cr <sub>0.6</sub> Ru <sub>0.4</sub> O <sub>2</sub>                    | 178                                           | 58             | 10                                      | 5600                                        | 15               |
| RuO <sub>2</sub> -WC NPs                                              | 347                                           | 88.5           | 10                                      | 2800                                        | 16               |
| Cu-doped RuO <sub>2</sub>                                             | 188                                           | 43.96          | 8                                       | 10375                                       | 17               |
| RuO <sub>2</sub> NSs                                                  | 199                                           | 38.2           | ~6.9                                    | 5940                                        | 18               |
| YBRO-0.15                                                             | 278                                           | 40.8           | 5                                       | 4583                                        | 19               |
| Y <sub>0.85</sub> Mg <sub>0.15</sub> Ru <sub>2</sub> O <sub>7</sub>   | 258                                           | 39.1           | 5                                       | 1301                                        | 20               |

\*The degradation rate was calculated from the reported chronopotentiometry curves under a constant current density of 10 mA cm<sup>-2</sup>.

**Supplementary Note 1**

The effective ionic radii and bond dissociation energies were obtained Lange's Handbook of Chemistry (15<sup>th</sup> Ed.)



## Supplementary References

1. Hao, S., Liu, M., Pan, J., Liu, X., Tan, X., Xu, N., He, Y., Lei, L., Zhang, X. Dopants fixation of Ruthenium for boosting acidic oxygen evolution stability and activity. *Nat. Commun.* **11** 5368 (2020).
2. Yao, Q., Yu, Z., Chu, Y.-H., Lai, Y.-H., Chan, T.-S., Xu, Y., Shao, Q., Huang, X. S incorporated RuO<sub>2</sub>-based nanorings for active and stable water oxidation in acid. *Nano Res.* **15** 3964-3970 (2022).
3. Ping, X., Liu, Y., Chen, S., Ran, N., Zheng, L., Wang, M., Guo, L., Wei, Z. Tailoring B-site of lead-ruthenate pyrochlore for boosting acidic water oxidation activity and stability. *Appl. Catal. B Environ.* **318** 121884 (2022).
4. He, J., Li, W., Xu, P., Sun, J. Tuning electron correlations of RuO<sub>2</sub> by co-doping of Mo and Ce for boosting electrocatalytic water oxidation in acidic media. *Appl. Catal. B Environ.* **298** 120528 (2021).
5. Qin, Y., Yu, T., Deng, S., Zhou, X.-Y., Lin, D., Zhang, Q., Jin, Z., Zhang, D., He, Y.-B., Qiu, H.-J., He, L., Kang, F., Li, K., Zhang, T.-Y. RuO<sub>2</sub> electronic structure and lattice strain dual engineering for enhanced acidic oxygen evolution reaction performance. *Nat. Commun.* **13** 3784 (2022).
6. Zhang, L., Jang, H., Liu, H., Kim, M.G., Yang, D., Liu, S., Liu, X., Cho, J. Sodium-Decorated Amorphous/Crystalline RuO<sub>2</sub> with Rich Oxygen Vacancies: A Robust pH-Universal Oxygen Evolution Electrocatalyst. *Angew. Chem. Int. Ed.* **60** 18821-18829 (2021).
7. Tian, Y., Wang, S., Velasco, E., Yang, Y., Cao, L., Zhang, L., Li, X., Lin, Y., Zhang, Q., Chen, L. A Co-Doped Nanorod-like RuO<sub>2</sub> Electrocatalyst with Abundant Oxygen Vacancies for Acidic Water Oxidation. *iScience* **23** 100756 (2020).
8. Wang, J., Cheng, C., Yuan, Q., Yang, H., Meng, F., Zhang, Q., Gu, L., Cao, J., Li, L., Haw, S.-C., Shao, Q., Zhang, L., Cheng, T., Jiao, F., Huang, X. Exceptionally active and stable RuO<sub>2</sub> with interstitial carbon for water oxidation in acid. *Chem* **8** 1673-1687 (2022).
9. Li, Z., Wang, S., Tian, Y., Li, B., Yan, H.j., Zhang, S., Liu, Z., Zhang, Q., Lin, Y., Chen, L. Mg-Doping improves the performance of Ru-based electrocatalysts for the acidic oxygen evolution reaction. *Chem. Commun.* **56** 1749-1752 (2020).
10. Miao, X., Zhang, L., Wu, L., Hu, Z., Shi, L., Zhou, S. Quadruple perovskite ruthenate as a highly efficient catalyst for acidic water oxidation. *Nat. Commun.* **10** 1-7 (2019).
11. He, J., Chen, W., Gao, H., Chen, Y., Zhou, L., Zou, Y., Chen, R., Tao, L., Lu, X., Wang, S. Tuning hydrogen binding modes within RuO<sub>2</sub> lattice by proton and electron co-doping for active and stable acidic oxygen evolution. *Chem Catal.* **2** 578-594 (2022).
12. Ge, R., Li, L., Su, J., Lin, Y., Tian, Z., Chen, L. Ultrafine Defective RuO<sub>2</sub> Electrocatalyst Integrated on Carbon Cloth for Robust Water Oxidation in Acidic Media. *Adv. Energy Mater* **9** 1901313 (2019).
13. Wang, K., Wang, Y., Yang, B., Li, Z., Qin, X., Zhang, Q., Lei, L., Qiu, M., Wu, G., Hou, Y. Highly active ruthenium sites stabilized by modulating electron-feeding for sustainable acidic oxygen-evolution electrocatalysis. *Energy Environ. Sci.* **15** 2356-2365 (2022).
14. Chen, S., Huang, H., Jiang, P., Yang, K., Diao, J., Gong, S., Liu, S., Huang, M., Wang, H., Chen, Q. Mn-Doped RuO<sub>2</sub> Nanocrystals as Highly Active Electrocatalysts for Enhanced Oxygen Evolution in Acidic Media. *ACS Catal.* **10** 1152-1160 (2020).
15. Lin, Y., Tian, Z., Zhang, L., Ma, J., Jiang, Z., Deibert, B.J., Ge, R., Chen, L. Chromium-ruthenium oxide solid solution electrocatalyst for highly efficient oxygen evolution reaction in acidic media. *Nat. Commun.* **10** 162 (2019).
16. Sun, S.-C., Jiang, H., Chen, Z.-Y., Chen, Q., Ma, M.-Y., Zhen, L., Song, B., Xu, C.-Y. Bifunctional

- WC-Supported RuO<sub>2</sub> Nanoparticles for Robust Water Splitting in Acidic Media. *Angew. Chem. Int. Ed.* **61** e202202519 (2022).
17. Su, J., Ge, R., Jiang, K., Dong, Y., Hao, F., Tian, Z., Chen, G., Chen, L. Assembling Ultrasmall Copper-Doped Ruthenium Oxide Nanocrystals into Hollow Porous Polyhedra: Highly Robust Electrocatalysts for Oxygen Evolution in Acidic Media. *Adv. Mater.* **30** 1801351 (2018).
  18. Zhao, Z.L., Wang, Q., Huang, X., Feng, Q., Gu, S., Zhang, Z., Xu, H., Zeng, L., Gu, M., Li, H. Boosting the oxygen evolution reaction using defect-rich ultra-thin ruthenium oxide nanosheets in acidic media. *Energy Environ. Sci.* **13** 5143-5151 (2020).
  19. Feng, Q., Zou, J., Wang, Y., Zhao, Z., Williams, M.C., Li, H., Wang, H. Influence of Surface Oxygen Vacancies and Ruthenium Valence State on the Catalysis of Pyrochlore Oxides. *ACS Appl. Mater. Interfaces* **12** 4520-4530 (2020).
  20. Feng, Q., Zhang, Z., Huang, H., Yao, K., Fan, J., Zeng, L., Williams, M.C., Li, H., Wang, H. An effective strategy to tune the oxygen vacancy of pyrochlore oxides for electrochemical energy storage and conversion systems. *Chem. Eng. J.* **395** 124428 (2020).
